# Supplementary material for: Modification of graphene oxide by a facile coprecipitation method and click chemistry for use as a drug carrier
Source: Royal Society of Chemistry journal article supplement (doi:10.1039/c4ra02219j), 2014-01-01
Supplement: c4ra02219j1.pdf [file c4ra02219j1.pdf]

## **Supplementary Information**

### **Modification of Graphene Oxide by a Facile Coprecipitation Method and Click Chemistry for Drug Carrier**

Guoqiang Xu, Pengwu Xu, Dongjian Shi, Mingqing Chen\*

Key Laboratory of Food Colloids and Biotechnology, Ministry of Education, School of Chemical and  
Material Engineering, Jiangnan University, Wuxi 214122, Jiangsu, P. R. China

Corresponding author: E-mail: mqchen@jiangnan.edu.cn

#### **Table of contents**

**I Preparation and characterization of PDMAEMA-N<sub>3</sub>**

**II Preparation and characterization of Fe<sub>3</sub>O<sub>4</sub>/Alkynyl-GO**

**III Preparation and characterization of Fe<sub>3</sub>O<sub>4</sub>/PDMAEMA-GO**

## I Preparation and characterization of PDMAEMA- $N_3$

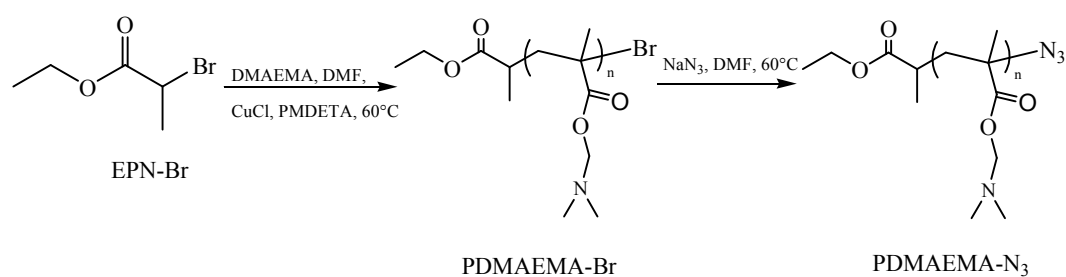

**Figure S1.** Schematic illustration for the synthesis of PDMAEMA- $N_3$

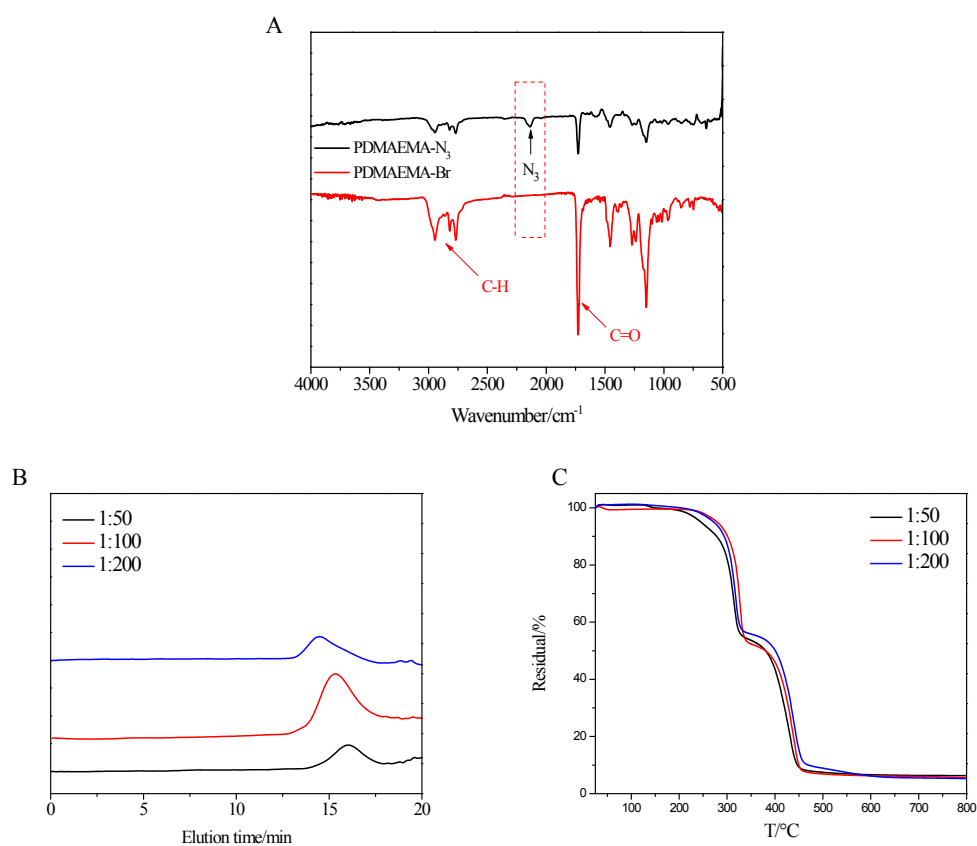

**Figure S2.** (A) FTIR spectra of PDMAEMA-Br and PDMAEMA- $N_3$ , (B) GPC curves of as-prepared PDMAEMA- $N_3$ , (C) TGA curves of as-prepared PDMAEMA- $N_3$  at a heating rate of  $10^\circ\text{C}\cdot\text{min}^{-1}$

**Table S1.** Number average molecular weight and PDI of different PDMAEMA- $N_3$  by GPC measurements

| Name                           | Molar ratio of initiator to monomer | $M_{n,(\text{GPC})}$ | PDI  |
|--------------------------------|-------------------------------------|----------------------|------|
| PDMAEMA <sub>50</sub> - $N_3$  | 1:50                                | 5710                 | 1.38 |
| PDMAEMA <sub>100</sub> - $N_3$ | 1:100                               | 8040                 | 1.42 |

## II Preparation and characterization of Fe<sub>3</sub>O<sub>4</sub>/Alkynyl-GO

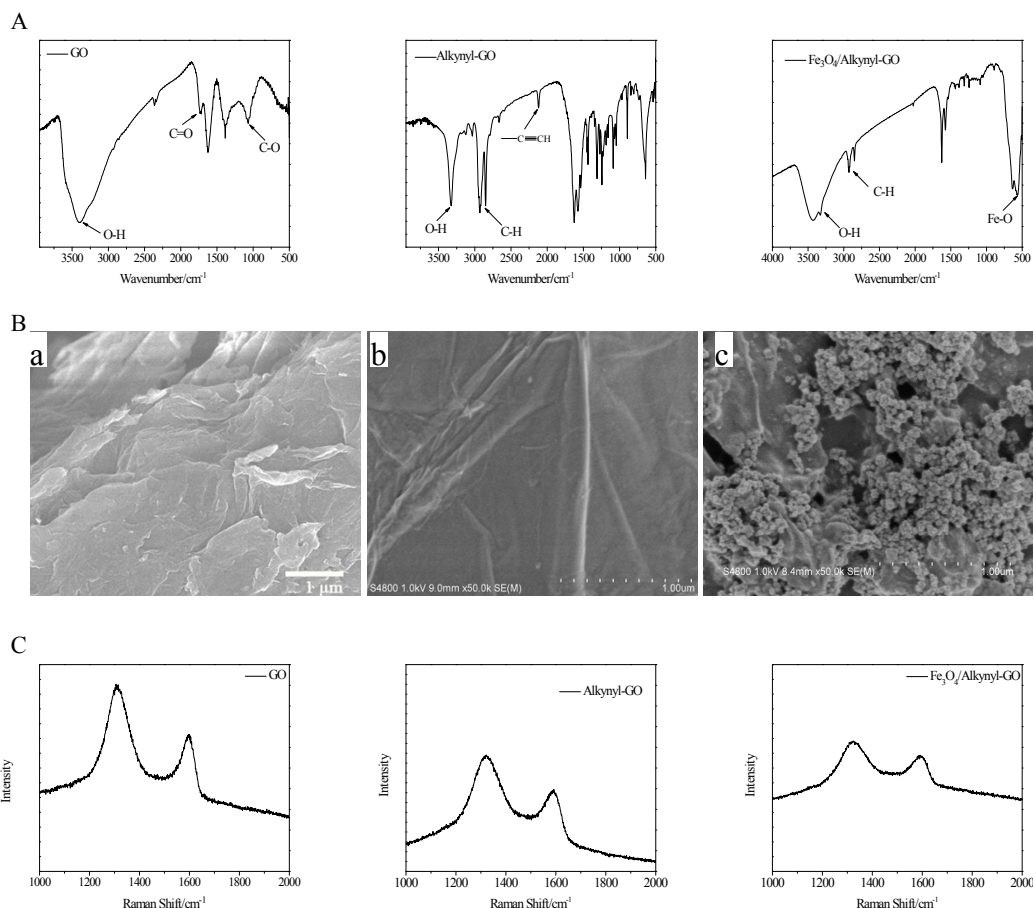

**Figure S3.** (A) FTIR spectra of graphene oxide (GO) and Alkynyl-GO and Fe<sub>3</sub>O<sub>4</sub>/Alkynyl-GO, (B) SEM images of (a)GO, (b) Alkynyl-GO and (c) Fe<sub>3</sub>O<sub>4</sub>/Alkynyl-GO, and (C) Raman spectra of GO, Alkynyl-GO and Fe<sub>3</sub>O<sub>4</sub>/Alkynyl-GO at a laser excitation wavelength of 532 nm

Figure S3 A displays that characteristic absorption peaks of modified GO that represent alkynyl group and stretching vibration of Fe-O bond are shown at 2100 cm<sup>-1</sup> (alkynyl group) and 582 cm<sup>-1</sup> (Fe-O) in FTIR spectra of Alkynyl-GO and Fe<sub>3</sub>O<sub>4</sub>/Alkynyl-GO.

Figure S3 B presents SEM images of GO and modified GO. The image of GO reveals a crumpled and rippled structure as a result of deformation upon the exfoliation and restacking process. The skeleton of GO sheets and anchored Fe<sub>3</sub>O<sub>4</sub> nanoparticles are clearly shown in SEM images. A large quantity of Fe<sub>3</sub>O<sub>4</sub> nanoparticles are deposited on surface of the GO sheets and distributed randomly without aggregation. Without the presence of GO sheets, bare Fe<sub>3</sub>O<sub>4</sub> nanoparticles can easily aggregate to large particles or clusters (Figure S5).

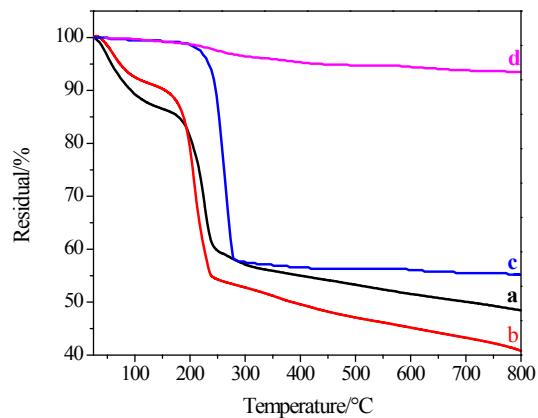

**Figure S4.** TGA curves of (a) GO, (b) Alkynyl-GO, (c) Fe<sub>3</sub>O<sub>4</sub>/Alkynyl-GO and (d) Fe<sub>3</sub>O<sub>4</sub> at a heating rate of 10 °C·min<sup>-1</sup> in nitrogen

**Table S2.** Weight ratio and grafting density determined by TGA

| Sample                                     | Weight ratio(%) |                                | Alkynyl groups per 10000 carbons <sup>(a)</sup> |
|--------------------------------------------|-----------------|--------------------------------|-------------------------------------------------|
|                                            | GO basal plane  | Alkynyl                        |                                                 |
| GO                                         | 100             | 0                              | 0                                               |
| Alkynyl-GO                                 | 93.4            | 6.2                            | 144                                             |
|                                            | Alkynyl-GO      | Fe <sub>3</sub> O <sub>4</sub> |                                                 |
| Fe <sub>3</sub> O <sub>4</sub> /Alkynyl-GO | 86.1            | 13.9                           | 144                                             |

<sup>(a)</sup> Calculated from Eq. S1

$$D_A = 10^4 M_C W_A / M_A W_C \quad \text{Eq. S1}^1$$

Where  $D_A$  is the grafting density (alkynyl groups per 10000 carbons),  $M_C$  is the relative molar mass of carbon ( $M_C = 12$  g/mol),  $M_A$  is the molecular weight of alkynyl groups ( $M_A = 55$  g/mol),  $W_C$  and  $W_A$  are the weight fractions of the GO backbone and the alkynyl groups.  $W_C$  and  $W_A$  can be obtained from the TGA curves.

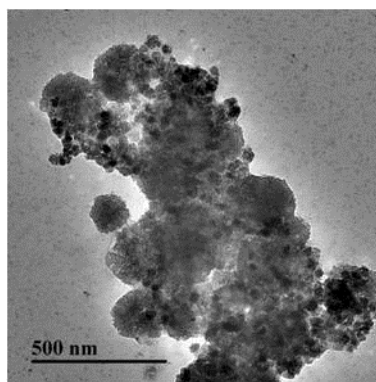

**Figure S5.** TEM image of bare Fe<sub>3</sub>O<sub>4</sub> nanoparticles

### III Preparation and characterization of Fe<sub>3</sub>O<sub>4</sub>/PDMAEMA-GO

**Table S3.** Preparation of various Fe<sub>3</sub>O<sub>4</sub>/PDMAEMA-GO composites by click reaction

| Sample         | Ingredients                                | PDMAEMA              |         | Fe <sub>3</sub> O <sub>4</sub> /Alkynyl-GO |
|----------------|--------------------------------------------|----------------------|---------|--------------------------------------------|
|                |                                            | $M_{n,(\text{GPC})}$ | Feed    | Feed                                       |
| S <sub>1</sub> | Fe <sub>3</sub> O <sub>4</sub> /PDMAEMA-GO | 5710                 | 0.51 g  | 0.1 g                                      |
| S <sub>2</sub> | Fe <sub>3</sub> O <sub>4</sub> /PDMAEMA-GO | 5710                 | 0.425 g | 0.1 g                                      |
| S <sub>3</sub> | Fe <sub>3</sub> O <sub>4</sub> /PDMAEMA-GO | 5710                 | 0.34 g  | 0.1 g                                      |
| S <sub>4</sub> | Fe <sub>3</sub> O <sub>4</sub> /PDMAEMA-GO | 8040                 | 0.48 g  | 0.1 g                                      |
| S <sub>5</sub> | Fe <sub>3</sub> O <sub>4</sub> /PDMAEMA-GO | 17130                | 1.02 g  | 0.1 g                                      |

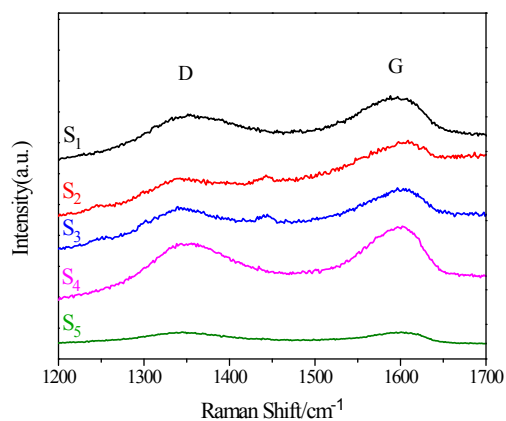

**Figure S6.** Raman spectra of Fe<sub>3</sub>O<sub>4</sub>/PDMAEMA-GO at a laser excitation wavelength of 532 nm

**Table S4.** The I<sub>D</sub>/I<sub>G</sub> ratio and crystallite size from Raman spectra

| Sample                                     | I <sub>D</sub> /I <sub>G</sub> ratio | La <sup>(a)</sup> |
|--------------------------------------------|--------------------------------------|-------------------|
| GO                                         | 1.39                                 | 13.83             |
| Alkynyl-GO                                 | 1.29                                 | 14.9              |
| Fe <sub>3</sub> O <sub>4</sub> /Alkynyl-GO | 1.12                                 | 17.16             |
| S <sub>1</sub>                             | 0.87                                 | 22.1              |
| S <sub>2</sub>                             | 0.84                                 | 22.88             |
| S <sub>3</sub>                             | 0.77                                 | 24.96             |
| S <sub>4</sub>                             | 0.86                                 | 22.34             |
| S <sub>5</sub>                             | 1.00                                 | 18.84             |

<sup>(a)</sup> Calculated from Eq. S2

$$L_a(\text{nm}) = (2.4 \times 10^{-10}) \lambda_{\text{laser}}^4 \left( \frac{I_D}{I_G} \right)^{-1} \quad \text{Eq. S2}^2$$

As shown in Figure S3 C, Figure S6 and Table S4, the variation of  $I_D/I_G$  ratio suggests the change of the average size of the  $\text{sp}^2$  domains. Decreased  $I_D/I_G$  ratio of products indicates the increase in size of the in-plane  $\text{sp}^2$  domains<sup>3</sup>, possibly due to the partial reduction of GO basal plane caused by the reductant sodium *L*-ascorbate in reaction process<sup>4</sup>. Crystallite size in Raman spectra is used to confirm the formation of covalent links between the GO sheets and grafted polymer chains<sup>2</sup>. The faint increment of the crystallite sizes ( $L_a$ ) after click chemistry attributes to the formation of covalent linkages between the alkynyl groups of GO sheets and the azide groups of polymer.

**Table S5.** Photographs of samples with different grafting densities at selected time

| Sample     | S <sub>1</sub>                                                                     |                                                                                    | S <sub>2</sub>                                                                     |                                                                                    | S <sub>3</sub>                                                                       |                                                                                      |
|------------|------------------------------------------------------------------------------------|------------------------------------------------------------------------------------|------------------------------------------------------------------------------------|------------------------------------------------------------------------------------|--------------------------------------------------------------------------------------|--------------------------------------------------------------------------------------|
| Time       | 1st day                                                                            | 30th day                                                                           | 1st day                                                                            | 30th day                                                                           | 1st day                                                                              | 30th day                                                                             |
| Photograph | 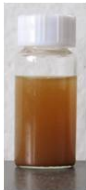 | 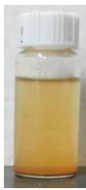 | 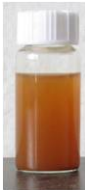 | 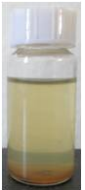 | 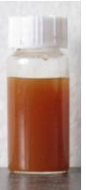 | 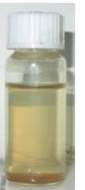 |

**Table S6.** Photographs of samples with different grafted chain length at selected time

| Sample     | S <sub>3</sub>                                                                      |                                                                                     | S <sub>4</sub>                                                                      |                                                                                     | S <sub>5</sub>                                                                        |                                                                                       |
|------------|-------------------------------------------------------------------------------------|-------------------------------------------------------------------------------------|-------------------------------------------------------------------------------------|-------------------------------------------------------------------------------------|---------------------------------------------------------------------------------------|---------------------------------------------------------------------------------------|
| Time       | 1st day                                                                             | 30th day                                                                            | 1st day                                                                             | 30th day                                                                            | 1st day                                                                               | 30th day                                                                              |
| Photograph | 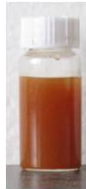 | 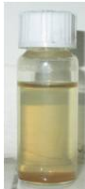 | 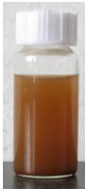 | 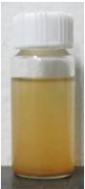 | 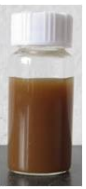 | 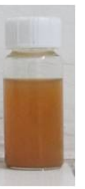 |

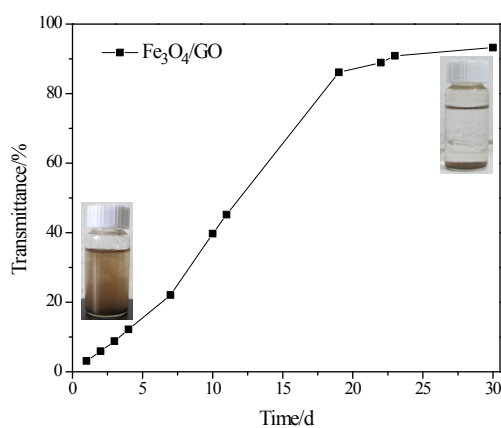

**Figure S7.** Stability test of Fe<sub>3</sub>O<sub>4</sub>/GO in PBS (pH=7.2) and photographs on 1st and 30th day

**Table S7.** Zeta potential ( $\zeta$ ) of Fe<sub>3</sub>O<sub>4</sub>/PDMAEMA-GO

| Sample         | $\zeta$ (mV) |
|----------------|--------------|
| S <sub>1</sub> | 34.14        |
| S <sub>2</sub> | 18.10        |
| S <sub>3</sub> | 13.62        |
| S <sub>4</sub> | 31.4         |
| S <sub>5</sub> | 49.25        |

## References

- 1 L. Y. Kan, Z. Xu, C. Gao, *Macromolecules*, 2011, **44**, 444-452.
- 2 M. A. Pimenta, G. Dresselhaus, M. S. Dresselhaus, L. G. Cancado, A. Jorio, R. Saito, *Phys. Chem. Chem. Phys.*, 2007, **9**, 1276-1290.
- 3 S. Stankovich, D. A. Dikin, R. D. Piner, K. A. Kohlhaas, A. Kleinhammes, Y. Y. Jia, Y. Wu, S. T. Nguyen, R. S. Ruoff, *Carbon*, 2007, **45**, 1558-1565.
- 4 J. L. Zhang, H. J. Yang, G. X. Shen, P. Cheng, J. Y. Zhang, S. W. Guo, *Chem. Commun.*, 2010, **46**, 1112–1114.
